# Supplementary material for: Humidity-driven nonlinear modulation of graphene reflectivity via interfacial wetting behavior
Source: Research Square preprint supplement (doi:10.21203/rs.3.rs-7814470/v1), 2025-10-20
Supplement: Supplementary file 1 [file 5a304e3ac96872a61f7d3f18.docx]

Supporting Information

Humidity-driven nonlinear modulation of graphene reflectivity via interfacial wetting behavior

Yang Liu1, Cheng Li*1,2, Zhen Wan1, Tiantian Ma3, Wei Zhou*3, Shangchun Fan*1

1School of Instrumentation Science and Opto-Electronics Engineering, Beihang University, Beijing 100191, China

2School of Instrumentation Science and Opto-Electronics Engineering, Beihang University, Beijing 100191, China; Shenzhen Institute of Beihang University, Shenzhen 518063, China

3School of Chemistry, Beijing Advanced Innovation Center for Biomedical Engineering, Beihang University, Beijing, 100191, China

**Corresponding author: Cheng Li (licheng@buaa.edu.cn); Wei Zhou (zhouwei@buaa.edu.cn); Shangchun Fan (shangcfan@buaa.edu.cn)*

The file includes:

Figs. S1 to S10.

Supplementary Note 1. The impact of variation in graphene reflectivity on the performance of photoelectric devices.

Supplementary Note 2. Determination of graphene reflectivity from the F−P spectrum.

Supplementary Note 3. Calculation of the change in F−P interference length due to water absorption.

Supplementary Note 4. FEM simulation settings for the shape and size of water droplets on graphene.


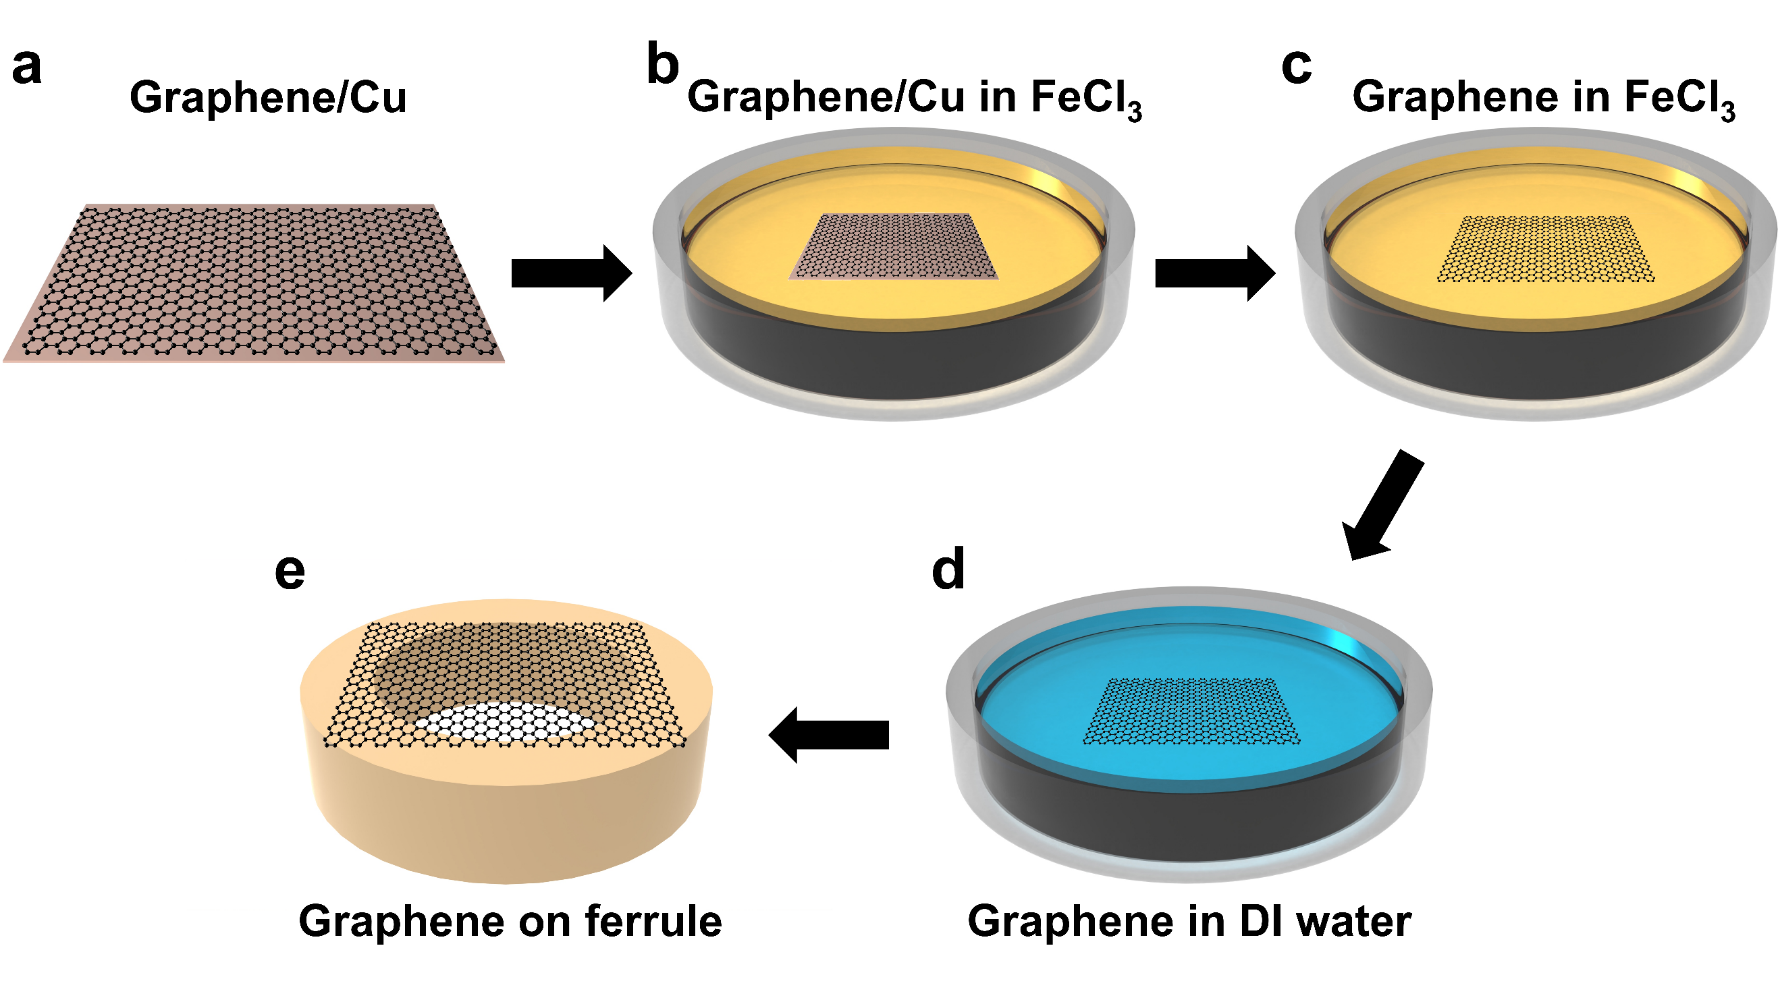


**Fig. S1** Schematic diagram of the process of transferring graphene onto the ferrule.


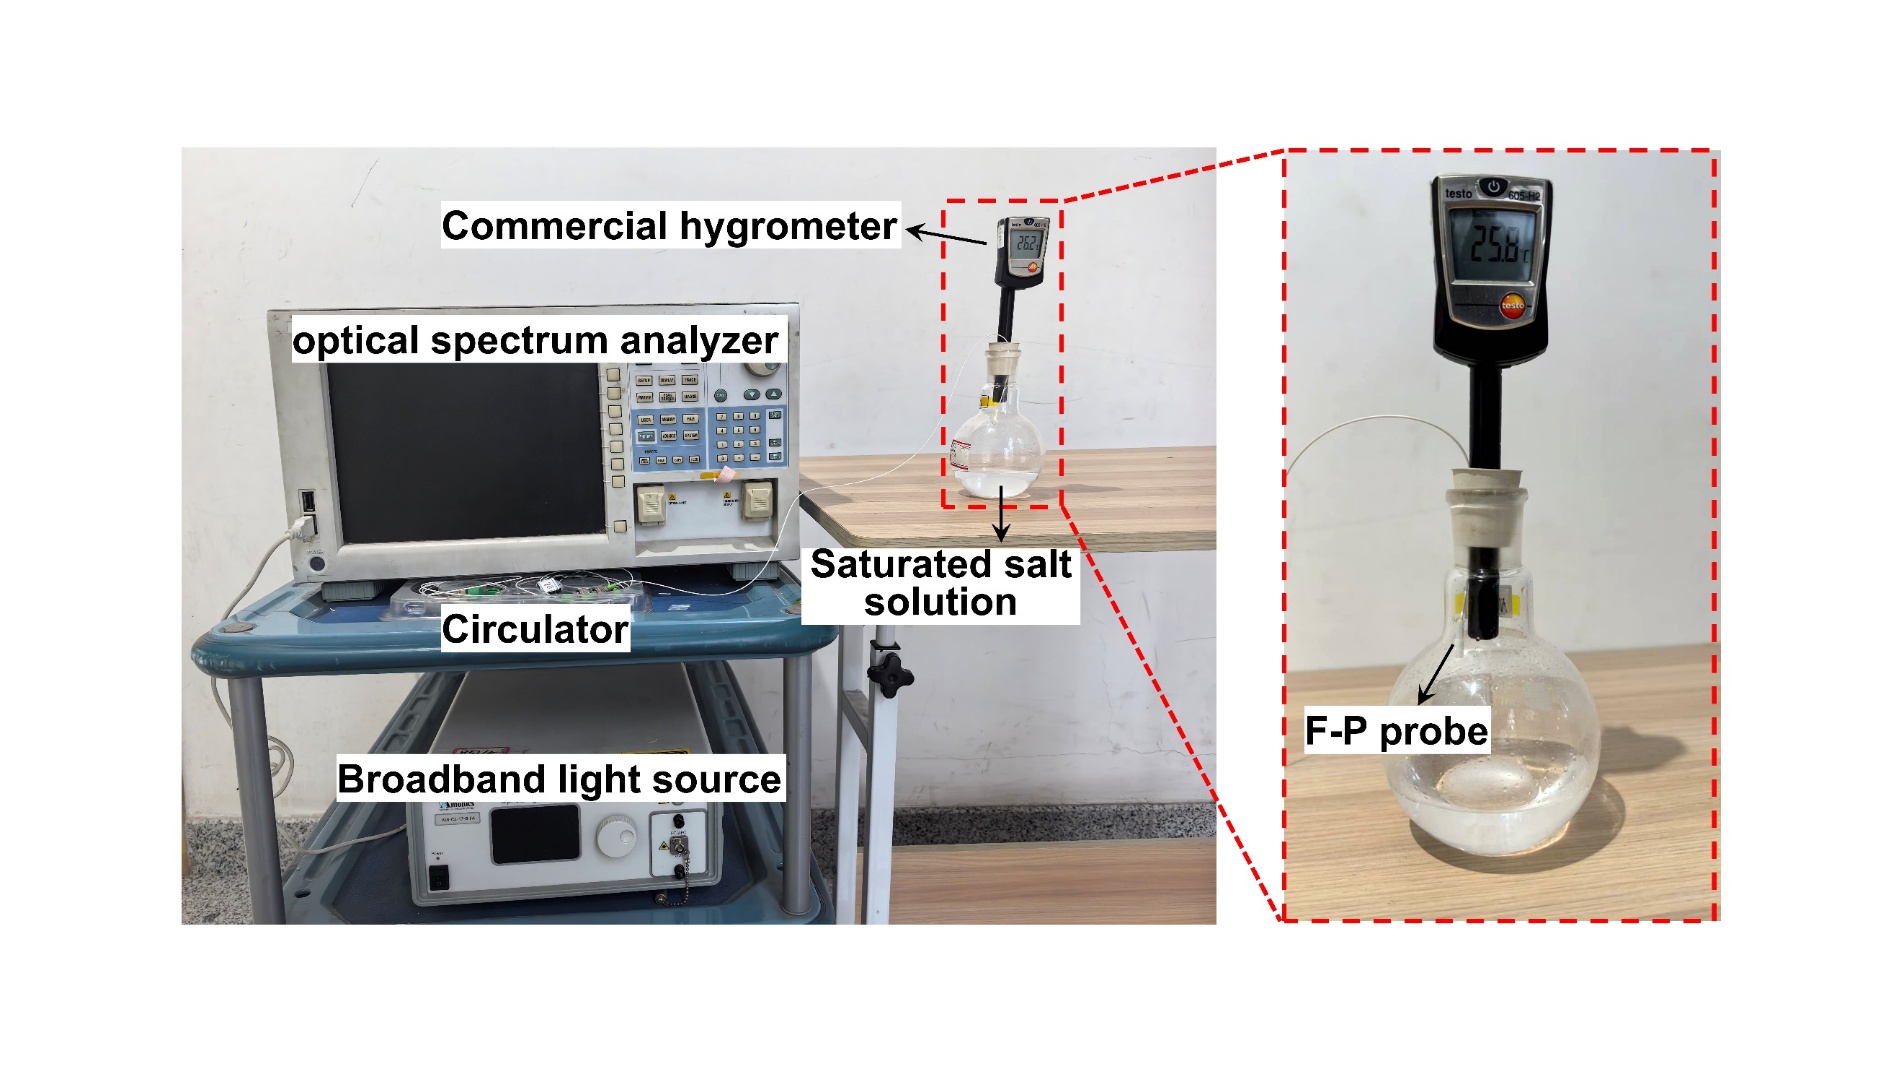


**Fig. S2** The experimental setup for measuring reflectivity of graphene under various RH conditions.


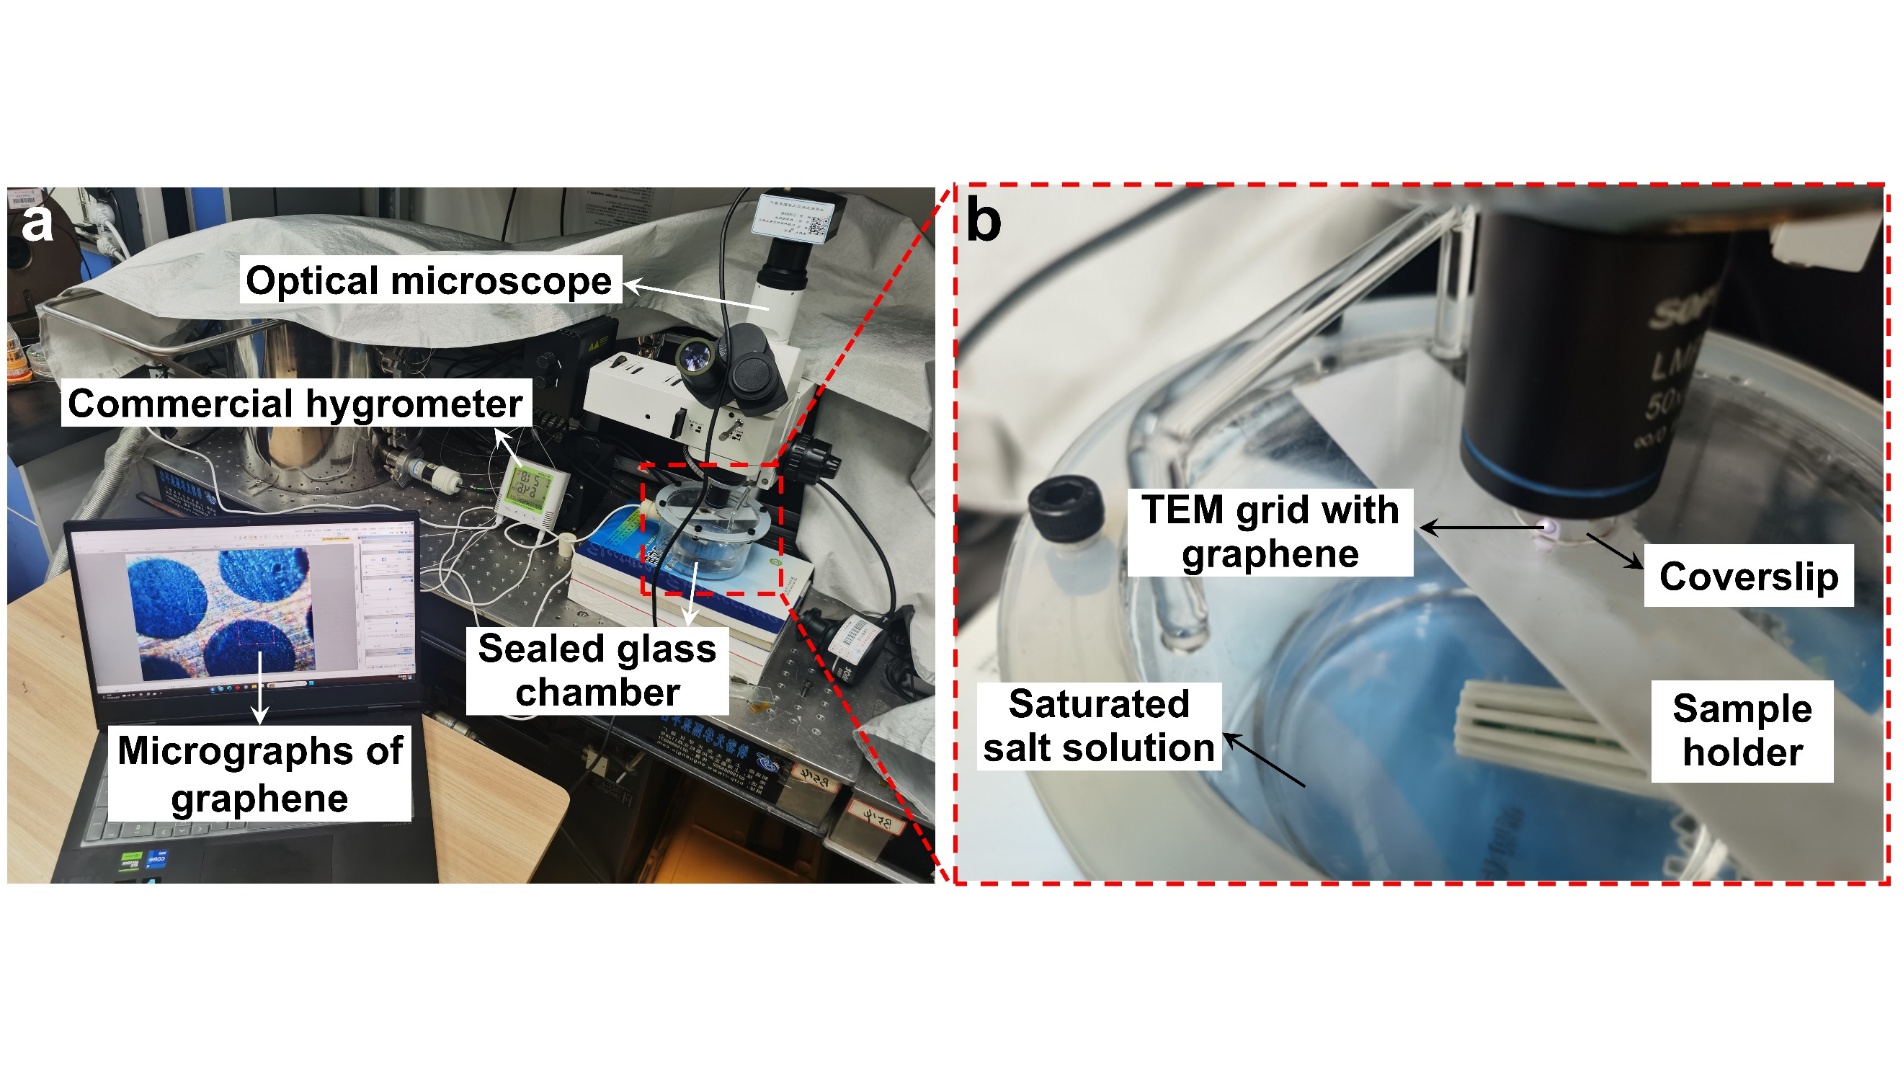


**Fig. S3** The experimental setup for investigating water droplet attachment on suspended graphene diaphragm under various RH conditions.





**Fig. S4** The sample in the vacuum chamber during the ESEM observations.


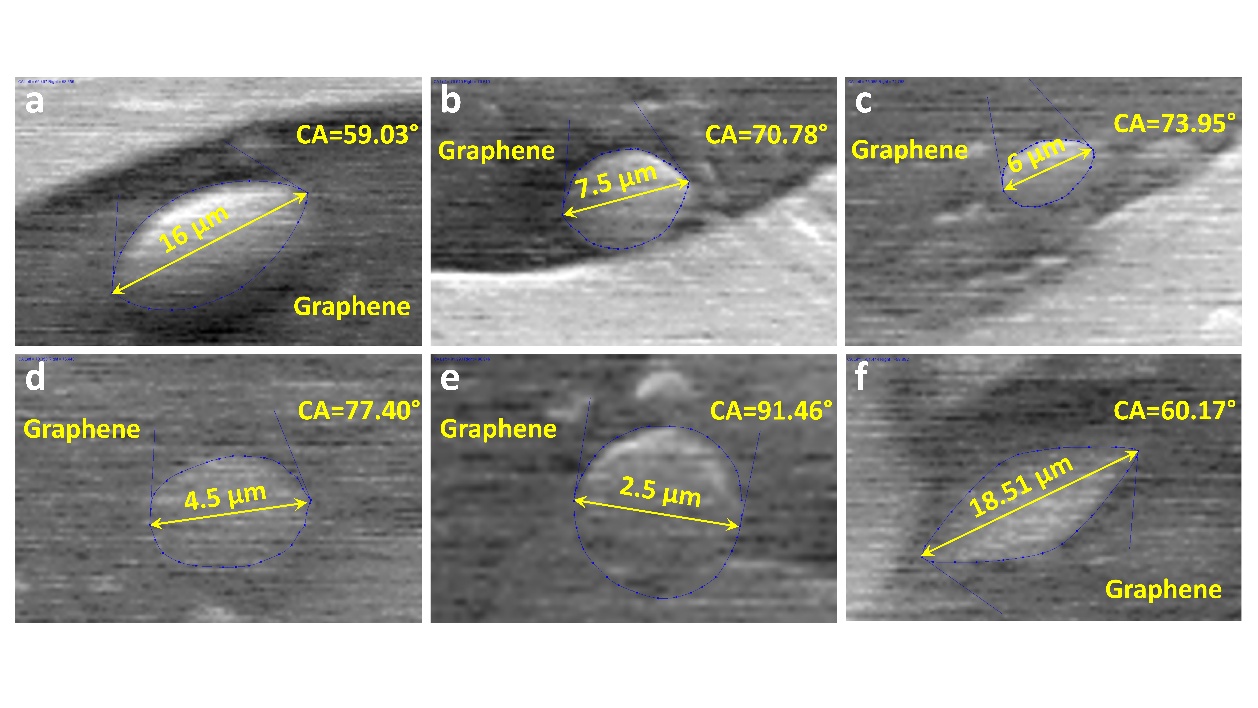


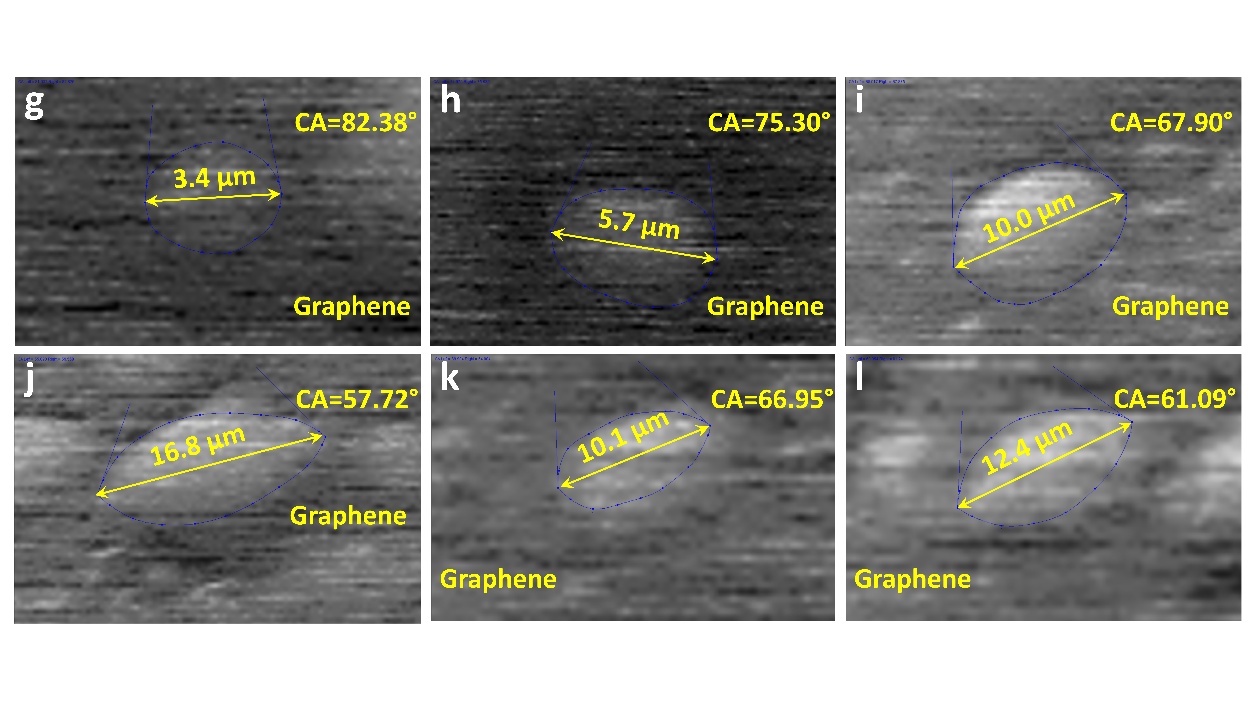


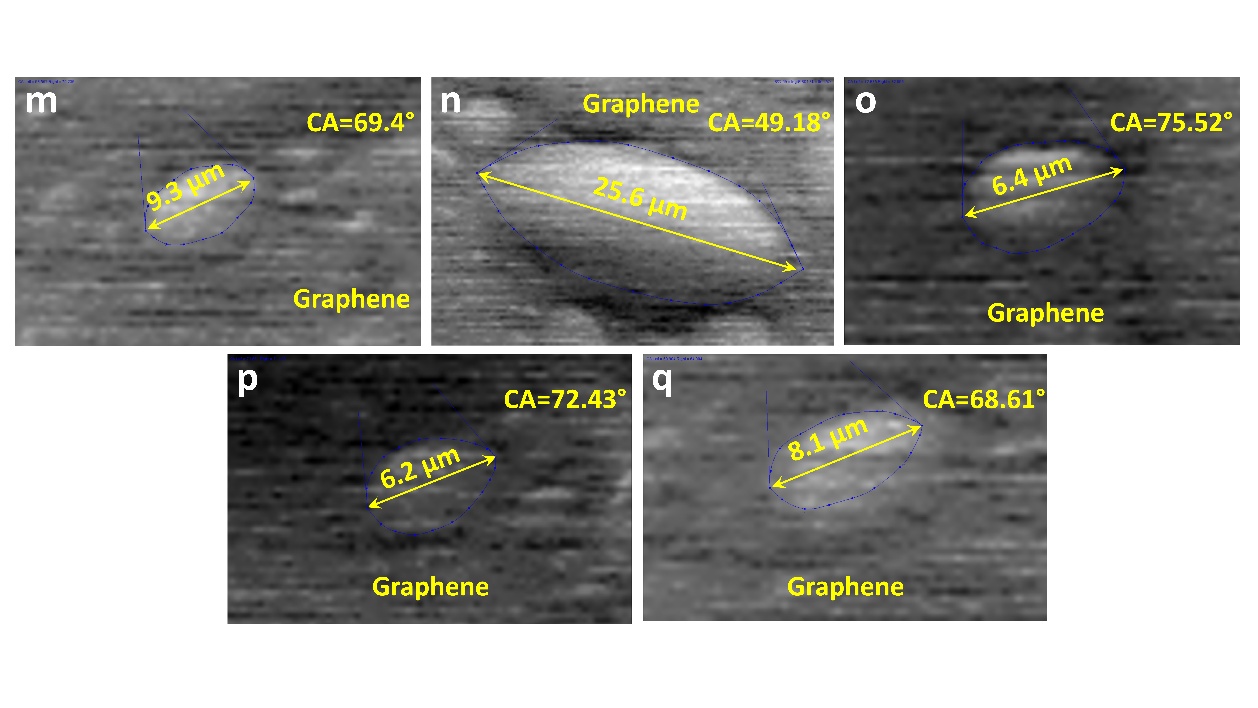


**Fig. S5** The CA of ESEM characterized water droplets with different diameters growing on 10-layer suspended graphene diaphragm.

To prevent droplet evaporation at extremely high magnifications, the magnification was maintained between 800× and 2500×, yielding clearly observable droplets with diameters of 2.5 μm to 25.6 μm. As shown in Fig. S6, the contact angle increases from 49.18° to 91.46° with decreasing droplet diameter from 25.6 μm to 2.5 μm, indicating a negative correlation between contact angle and droplet size.

**Fig. S6** The predicted CA of droplets with different diameters (1.14 μm–2.08 μm) using the fitting curve shown in Fig. 3f.

Experimental data reveal a logarithmic correlation between contact angle and droplet diameter. Thus, for the measured diameters (1.37–2.50 μm) in Fig. 3b, the predicted CAs range from 88.37° to 97.97° based on this fitting equation.


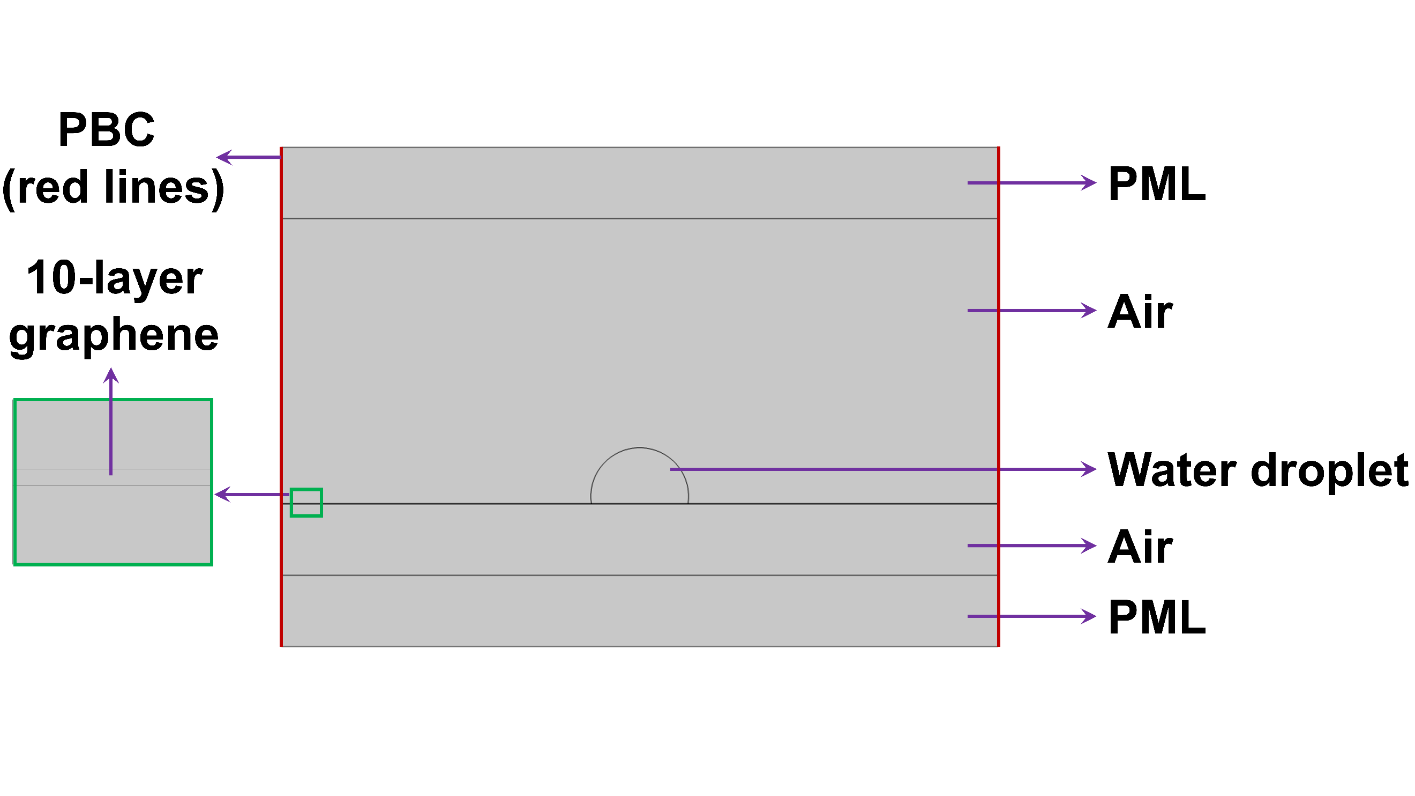


**(a)**


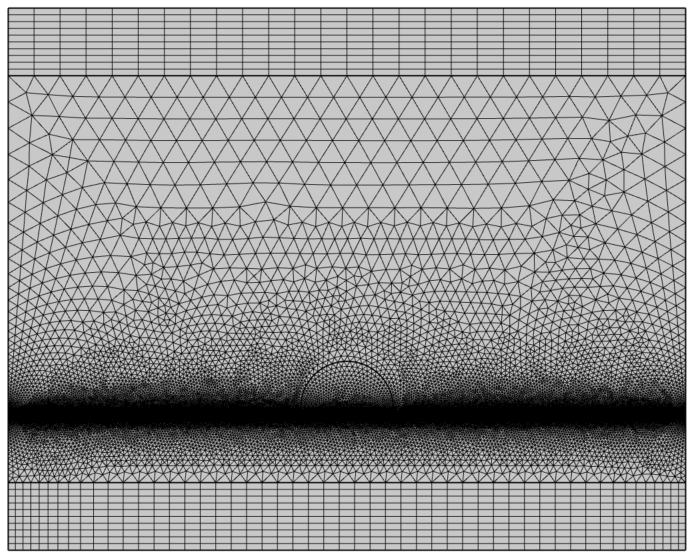


**(b)**

**Fig. S7** Wave optics simulation over 1555−1610 nm using COMSOL Multiphysics.a)FEM model of the water droplet on the suspended graphene. b) The 2D mesh is defined using free triangular elements.

**Fig. S8** The simulated reflectivity of the graphene-droplet system at different wavelengths.

To verify wavelength-dependent reflectivity (1555–1605 nm) of graphene, FEM simulations were performed to determine the reflectivities of the graphene-droplet system under different droplet densities, diameters, and contact angles (Fig. 3), with results shown in Fig. S9. All correlation coefficients (*R*2 > 0.97) in Fig. S9 confirm a strictly linear reflectivity-wavelength relationship. Due to the averaging effect of the fitting method (Note 2, Supporting Information), a median wavelength of 1580 nm was selected in the FEM simulation to reduce computational complexity

**Fig. S9** The simulated reflectivity of the graphene-droplet system at different CAs.

According to Fig. S10, the relative changes in reflectivity of the graphene-droplet system for four representative droplet densities and sizes (3.3%, 1.37 μm; 6.8%, 1.72 μm; 11.2%, 1.94 μm; 18.4%, 2.50 μm) induced by the variation in CA are all less than 1.3%. Hence, the influence of CA on the reflectivity can be considered negligible.

**Supplementary Note 1. The impact of relative variation in graphene reflectivity on the performance of photoelectric information devices.**

(1) Graphene-based F−P acoustic sensor

The incident light from a single-mode fiber is reflected by both the end face of the fiber and the graphene diaphragm, producing F−P interference. When external acoustic pressure is applied to the graphene, the deformation of the diaphragm results in changes in the F−P interference intensity. By measuring the F−P interference intensity changes, acoustic signal can be analyzed. Based on this operating principle, the sensitivity of the sensor can be expressed as:1

(S-1)

where *Iin* is the intensity of the incident light; *Ra* and *Rb* are reflectivity values of the end face of the single-mode fiber and the graphene diaphragm; *λ* is the wavelength of the incident light; and *ξ* is the coupling coefficient of cavity length, which is related to the wavelength *λ* and cavity length *L*. According to Eq. S-1, the relationship between the variation in graphene reflectivity (∆*Rb*) and the corresponding variation in sensitivity (∆*S*) can be expressed as:

(S-2)

Thus, assuming a relative enhancement in graphene reflectivity of 50%, the corresponding relative increase in the sensor’s sensitivity is 22%.

(2) Graphene-based photonic modulator

Graphene-based optical modulator is a device that controls the intensity of transmitted light via the electrical tuning of graphene's Fermi level. The optical modulation mechanism of graphene operates as follows: when an external voltage is applied to the graphene, the carrier concentration in graphene changes, leading to a shift in the Fermi level. This shift in the Fermi level induces a variation in optical conductivity, subsequently altering the optical absorption rate of graphene (*α*).2,3 When the incident light with an initial intensity *I*0 passes through graphene, the intensity *IT* of the transmitted light can be expressed as:

(S-3)

where *LM* represents the modulation length. When droplets adsorb onto the surface of the graphene film, the change in the reflectivity of the graphene is ∆*Rb*, while the light absorption rate of graphene *α* remains unchanged. Therefore, according to Eq. S-3, the relationship between the relative change in the reflectivity of graphene and the relative change in the output light intensity of the modulator can be expressed as:

(S-4)

At this point, for a relative enhancement in the graphene reflectivity of 50%, the corresponding relative decrease in the output light intensity of the modulator is −50%.

(3) Graphene-based photodetector

Due to the high carrier mobility of graphene, graphene-based photodetector demonstrates significant advantages in bandwidth.4,5 According to the literature,6 the photocurrent (*Iph*) in graphene results from the depletion of hole carriers under illumination. Correspondingly, the photocurrent in graphene can be expressed as:

(S-5)

where *Wg* is the width of the Ohmic contacts; Δ*p* is the decrease in the hole density under illumination; *µ* is the hole mobility; *E* represents the electric field strength. The change in hole density, Δ*p*, can be expressed as follows:

(S-6)

where *ħ* is the Planck constant; *ν* represents the photon frequency; *η* denotes the quantum efficiency; *Popt* indicates the optical power; *τ* refers to the lifetime of photogenerated carriers; and *Lg* signifies the suspended length of graphene. If a bias voltage (*Vbias*) is applied to the graphene, the electric field strength (*E*) within the graphene is *E*=*Vbias*/ *Lg*. In this case, the photogenerated current can be expressed as:

(S-7)

Furthermore, the responsivity of the graphene-based photodetector can be calculated by:

(S-8)

Upon the change of graphene's reflectivity from *Rb* to *Rb*+∆*Rb*, the variation in the effective optical power (∆*Popt*) incident on the graphene surface is given by:

(S-9)

By combining Eqs. S-7, S-8 and S-9, the relationship between the relative change in graphene's reflectivity and the relative change in the responsivity of the photodetector can be expressed as:

(S-10)

Hence, for a relative enhancement in the graphene reflectivity of 50%, the corresponding relative decrease in the responsivity of the photodetector is −50%.

**Supplementary Note 2. Graphene reflectivity determination from the F−P spectrum.**

Due to the low reflectivity at both the graphene diaphragm and the fiber end/air interface, the F−P interference intensity *Io* can be approximated as follows:7

(S-11)

The coupling coefficient of cavity length *ξ* is a function of *λ* and *L*, which can be expressed by:7

(S-12)

where *w*0 is the mode field radius, and *N*0 is the refractive index of medium in the F−P cavity. Considering the SMF-28 single-mode fiber used in the experiments, *w*0 is 4.9 μm. It should be noted that the coupling coefficient obtained from Eq. S-2 contains errors, leading to inaccuracies in the calculated graphene reflectivity. Consequently, according to our previous work,8 Eq. S-2 is revised as follows:

(S-13)

where *C*(*L*) is the compensation factor, which can be expressed as:8

(S-14)

where *ROSA* is the standard reflectivity of the reflective fiber end face, and *Ra*(*L*) is the calculated reflectivity of the same reflective fiber end face at different cavity lengths.

In this case, the reflectivity of graphene is determined by fitting the F−P interference spectrum with Eq. S-3.

**Supplementary Note 3. Calculation of the change in F−P interference length due to water absorption.**

As indicated by Eq. S-1, the relationship between the peak wavelength (*λP*) and corresponding F-P cavity length (*LP*) can be expressed as:

(S-15)

In this case, the variation of the F−P length (∆*LP*) resulting from the change (∆*λP*) in peak wavelength can be determined as follows:

(S-16)

Referring to Fig. 2b, ∆*λP* can be determined to be 8 nm. *λP* is set as 1580 nm, representing the median value within the range of interference spectra. *LP* calculated by demodulating the interference spectrum can be expressed as:1

(S-17)

where *λ1* and *λ2* are the wavelengths of light corresponding to the adjacent peaks of the interference spectrum, respectively. According to Eq. S-17, *LP* can be calculated to be 58 μm. Consequently, the change in the F−P length is determined to be 0.29 μm.

**Supplementary Note 4. FEM simulation settings for the shape and size of water droplets on graphene.**

Referring to previous literature,9,10,11 for droplets with the diameter less than capillary length (*k*), the effect of gravity can be neglected, allowing the droplet to be regarded as part of a perfectly spherical cap. The capillary length can be expressed as:10,11

(S-18)

where γ is the surface tension of the water-air interface; *ρ* is the density of the droplet; g is the gravitational acceleration. Note that the capillary length of water is ~103 μm. Considering the diameters of water droplets are all smaller than 26 μm (Fig. 3), the droplet in the FEM simulation can be modeled as part of the sphere (Fig. S10).9


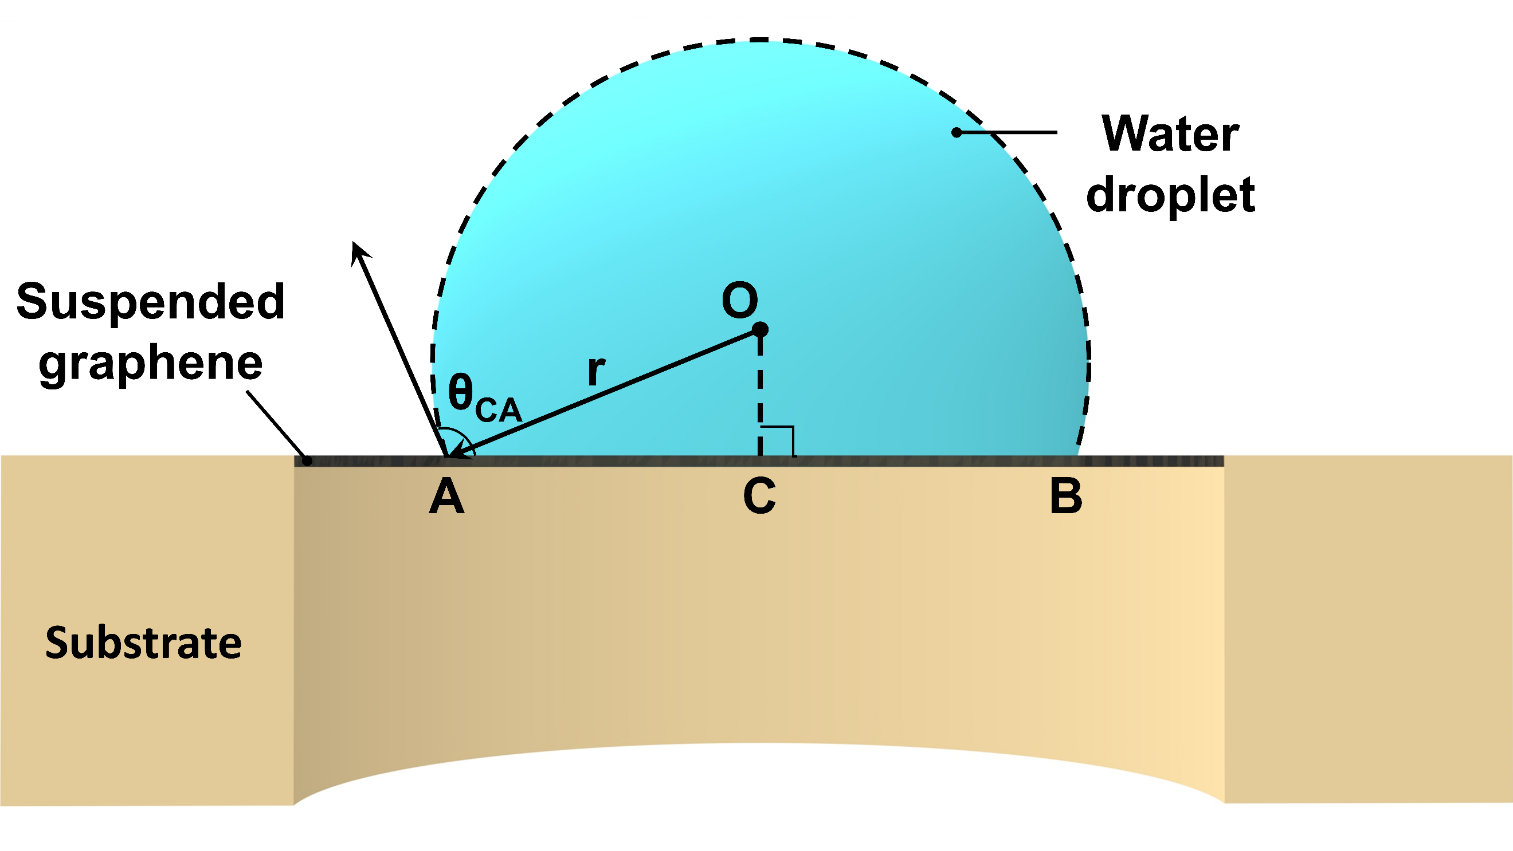


**Fig. S10** Schematic of the droplet on suspended graphene.

To enhance the computational efficiency of the FEM, the structure is modeled as periodic arrays using periodic conditions (Fig. S7). This approach enables the modeling of periodically distributed droplets on suspended graphene. It should be noted that the width of each unit cell in the arrays is designated as *Lu*. The distribution density (*ρ*d) of the droplet during FEM simulation is expressed as:

(S-19)

where *r* is the radius of the droplets, *θCA* is the contact angle of the droplet on the graphene diaphragm.

**References**

1. Liu, Y., Li, C., Li, B. X., Lu, S. S., Fan, S. C., Dong, S. X., Wan, Z. & Shen, M. X. Ultrasensitive acoustic detection using an enlarged Fabry–Perot cavity with a graphene diaphragm. *ACS Applied Materials & Interfaces* **15**, 51390 (2023).

2. Liu, M., Yin, X. B., Ulin-Avila, E., Geng, B. S., Zentgraf, T., Ju, L., Wang, F. & Zhang, X. A graphene-based broadband optical modulator. *Nature* **474**, 64 (2011).

3. Gosciniak, J. & Tan, D. T. H. Theoretical investigation of graphene-based photonic modulators. *Scientific Reports* **3**, 1897 (2013).

4. Xia, F. N., Mueller, T., Lin, Y. M., Valdes-Garcia, A. & Avouris, P. Ultrafast graphene photodetector. *Nature Nanotechnology* **4**, 839 (2009).

5. Engel, M., Steiner, M., Lombardo, A., Ferrari, A. C., Löhneysen, H. V., Avouris, P. & Krupke, R. Light-matter interaction in a microcavity-controlled graphene transistor. *Nature Communications* **3**, 906 (2012).

6. Hu, A. Q., Tian, H. J., Liu, Q. L., Wang, L., Wang, L., He, X. Y., Luo, Y. & Guo, X. Graphene on self-assembled InGaN quantum dots enabling ultrahighly sensitive photodetectors. *Advanced Optical Materials* **7**, 1801792 (2019).

7. Yu, F. F., Liu, Q. W., Gan, X., Hu, M. X., Zhang, T. Y., Li, C., Kang, F. Y., Terrones, M. & Lv, R. T. Ultrasensitive pressure detection of few-layer MoS2. *Advanced Materials* **29**, 1603266 (2017).

8. Wan, Z., Li, C., Liu, Y., Liu, Y. J., Xiao, X. & Han, S. Measuring optical reflectivity of graphene films using compensated Fabry-Perot interferometry. *Applied Surface Science* **639**, 158237 (2023).

9. Zhang, J. C., Jia, K. C., Huang, Y. F., Liu, X. T., Xu, Q. H., Wang, W. D., Zhang, R., Liu, B. Y., Zheng, L. M., Chen, H., Gao, P., Meng, S., Lin, L., Peng, H. L. & Liu, Z. F. Intrinsic wettability in pristine graphene. *Advanced Materials* **34**, 2103620 (2022).

10. Stelmashenko, N. A., Craven, J. P., Donald, A. M., Terentjev, E. M. & Thiel, B. L. Topographic contrast of partially wetting water droplets in environmental scanning electron microscopy. *Journal of Microscopy-Oxford* **204**, 172 (2001).

11. Brugnara, M., Della Volpe, C., Siboni, S. & Zeni, D. Contact angle analysis on polymethylmethacrylate and commercial wax by using an environmental scanning electron microscope. *Scanning* **28**, 267 (2006).
